# Supplementary material for: Comparative Analyses of Phytochemical Variation Within and Between Congeneric Species of Willow Herb, Epilobium hirsutum and E. parviflorum: Contribution of Environmental Factors
Source: Front Plant Sci. 2021 Feb 17;11:595190. doi: 10.3389/fpls.2020.595190 (PMC7925418; doi:10.3389/fpls.2020.595190)
Supplement: Supplementary Table 1 — Chemical composition (mg/g DW) of 31 and 16 natural populations of Epilobium hirsutum and E. parviflorum, respectively. [file Table_1.xlsx]

## Sheet: Table S1
Table S1. Chemical composition (mg /g DW) of 31 and 16 natural populations of Epilobium hirsutum and E. parviflorum, respectively*.								Province	Mazandaran	Gilan	Golestan	Golestan	Golestan	Golestan	West Azerbaijan	Ardabil	Gilan	West Azerbaijan	Ghazvin	Mazandaran	Gilan	Ardabil	West Azerbaijan	Isfahan	Mazandaran	East Azerbaijan	Lorestan	West Azerbaijan	Ardabil	Kohkiloyeh & Boyerahmad	Lorestan	Tehran	Fars	Fars	Lorestan	Isfahan	Chaharmahal Bakhtiari	Tehran	Yazd	Golestan	Gilan	Ardabil	Gilan	West Azerbaijan	Ardabil	Mazandaran	West Azerbaijan	Isfahan	Lorestan
								Mountain	Alborz	Alborz	Alborz	Alborz	Alborz	Alborz	Cross Alborz & Zagros	Cross Alborz & Zagros	Alborz	Cross Alborz & Zagros	Alborz	Alborz	Alborz	Cross Alborz & Zagros	Cross Alborz & Zagros	Zagros	Alborz	Cross Alborz & Zagros	Zagros	Cross Alborz & Zagros	Cross Alborz & Zagros	Zagros	Zagros	Alborz	Zagros	Zagros	Zagros	Zagros	Zagros	Alborz	Zagros	Alborz	Alborz	Cross Alborz & Zagros	Alborz	Cross Alborz & Zagros	Cross Alborz & Zagros	Alborz	Cross Alborz & Zagros	Zagros	Zagros
								Locality	Noor-Chamestan	Rahimabad- bandbon	Aliabad-Zaringol	Aliabad-Shirinabad	Jirabad-Shahrood	Ziaarat	Khoy-Ghotor	Fandoghloo	Damash 3	Kaleybar-Ghale babak	Alamut-Ghazvin (dikin)	Kelardasht-Roodbarak	Deylaman	Anbaran	Ayneroom spring	Sandgan springs	Javaherdeh	Marand-tabriz (yam)	Alashtar (kahnam)	Silvana-Movana	Kindarasi-Ardabil	Yasouj	Aligudarz	Ahar 2	Fars-Aspas	Margoon waterfall	Azizabad	Ghazaan-Ghamsar	Dimeh	Tangeh vashi	Dehebala-Tezerjan	Aliabad-Shirinabad	Chahar mahal-Barehsar	Heyran (Telecabine)	Damash 3	Kaleybar-Ghale babak	Heyran (Tunnel)	Kelardasht-Roodbarak	Ayneroom spring	Sandgan spring	Alashtar(Kahnam)
								Altitude	14.6	88	237.4	641	936.1	1190.8	1222.4	1432.7	1436	1470.8	1544	1553	1585.4	1710	1719.3	1722	1745	1747.6	1760	1778.9	1846.6	1921.8	2021.5	2076	2141.8	2146.6	2210	2224	2236.8	2591	2600	641	1118	1245	1436	1470.8	1510	1625.3	1719.3	1722	1760
								Longitude	52.0402	50.31	54.9322	55.0277	55.4601	54.4649	44.8955	48.5359	49.8119	47.0112	50.4017	51.0897	49.9327	48.4625	45.1327	51.2834	50.4756	45.7837	48.2824	44.7861	47.899	51.6045	49.7406	51.4692	52.3964	51.888	49.5013	51.3971	50.2272	52.7266	54.1202	55.0277	49.7331	48.58	49.8119	47.0112	48.5669	51.0838	45.1327	51.2834	48.2824
								Latitude	36.5289	37.0119	36.8937	36.815	36.9186	36.7321	38.5259	38.3959	36.7755	38.8508	36.4497	36.4689	36.8948	38.5244	37.1828	31.2598	36.8571	38.3547	33.9435	37.497	37.9847	30.7096	33.3575	35.9312	30.6434	30.5308	33.2846	33.7059	32.5125	35.9012	31.5862	36.815	36.7771	38.4124	36.7755	38.8508	38.4472	36.4612	37.1828	31.2598	33.9435
								Species	E. hirsutum	E. hirsutum	E. hirsutum	E. hirsutum	E. hirsutum	E. hirsutum	E. hirsutum	E. hirsutum	E. hirsutum	E. hirsutum	E. hirsutum	E. hirsutum	E. hirsutum	E. hirsutum	E. hirsutum	E. hirsutum	E. hirsutum	E. hirsutum	E. hirsutum	E. hirsutum v. villosum	E. hirsutum	E. hirsutum v. villosum	E. hirsutum	E. hirsutum	E. hirsutum v. villosum	E. hirsutum v. villosum	E. hirsutum	E. hirsutum	E. hirsutum	E. hirsutum	E. hirsutum	E. parviflorum	E. parviflorum	E. parviflorum	E. parviflorum	E. parviflorum	E. parviflorum	E. parviflorum	E. parviflorum	E. parviflorum	E. parviflorum
								Pop ID	EPH1	EPH2	EPH3	EPH4	EPH6	EPH7	EPH8	EPH9	EPH10	EPH11	EPH12	EPH13	EPH14	EPH15	EPH16	EPH17	EPH18	EPH19	EPH20	EPH21	EPH22	EPH23	EPH24	EPH25	EPH26	EPH27	EPH28	EPH29	EPH30	EPH32	EPH34	EPP1	EPP2	EPP3	EPP4	EPP5	EPP6	EPP8	EPP9	EPP10	EPP11
Peak Nr	Scan Nr	RT	RI	RI calc	Mass	Mass_Scan	Group	Compound	1	2	3	4	5	6	7	8	9	10	11	12	13	14	15	16	17	18	19	20	21	22	23	24	25	26	27	28	29	30	31	32	33	34	35	36	37	38	39	40	41
59884	5954	49.2	2864.23	2939.34	368	368_5954	Flavonoid	catechin	0.000856803	0.00432925	0.0154764	0.00478504	0.00419046	0.000850408	0.0249488	0.00569422	0.00396848	0.000358035	0.015206	0.00348825	0.0112854	0.00151356	0.0116068	0.00730407	0.000482303	0.00649294	0.00754475	0.0306639	0.0094697	0.00303805	0.0723528	0.00760707	0.0135502	0.00188604	0.0137931	0.0106018	0.0150165	0.0204641	0.0119232	0.0068697	0.0147011	0.00827855	0.0123538	0.00248907	0.00672872	0.0138236	0.00361681	0.0137906	0.00403107
58195	5798	48.1	2841.87	2856.46	356	356_5798	Flavonoid	epicatechin	0.000856803	0.0444181	0.0486541	0.00983767	0.000872904	0.000880172	0.0172427	0.00871216	0.00128962	0.000676686	0.0236454	0.0061742	0.0112854	0.00261846	0.00672276	0.0205244	0.000643875	0.025777	0.00485139	0.0190235	0.0246686	0.00396734	0.0234569	0.0081776	0.00935214	0.00244269	0.0191724	0.0253384	0.0242517	0.015123	0.0119232	0.0223265	0.00125597	0.0268982	0.0123538	0.00418164	0.0247617	0.0313105	0.00777614	0.280914	0.0235817
69684	6447	52.71		3220.2	663	663_6447	Flavonoid	flavonoid1	0.112224	0.270405	1.08482	0.34128	0.0703909	0.0456967	1.18815	1.04725	0.211084	0.0638269	5.37366	0.527511	2.49887	0.424456	1.77678	19.8327	0.171702	2.28918	1.5185	10.4605	6.9294	1.28793	8.46355	4.02376	2.99792	0.477483	4.70331	2.83026	3.6373	12.9897	4.67634	2.49199	0.321257	2.39321	1.60427	0.357779	1.207	3.09421	0.828901	3.07978	0.812482
52064	6526	53.27		3267.43	309	309_6526	Flavonoid	flavonoid2	0.00626751	0.0221441	0.0616111	0.0407201	0.00696765	0.00952031	0.0687347	0.083705	0.0147416	0.00832073	0.015206	0.0464984	0.109073	0.0206753	0.067151	0.0572639	0.00958337	0.0487295	0.0450845	0.161134	0.13982	0.0294036	0.273471	0.0955448	0.0861228	0.0184479	0.13669	0.125367	0.115552	0.115163	0.189341	0.0413213	0.0142301	0.0470719	0.108837	0.0326068	0.0668835	0.166229	0.0451378	0.137285	0.0458131
67800	6158	50.65	3071.9	3052.27	559	559_6158	Flavonoid	kaempferol	0.0434956	0.03011	0.251385	0.170451	0.044848	0.0346031	0.871585	0.745601	0.138016	0.0501464	1.05355	0.422357	1.26684	0.166742	0.374732	0.0692426	0.0280098	0.405127	0.320443	1.05702	0.972348	0.223136	2.18463	0.990669	0.553605	0.114151	0.908138	0.606531	1.07338	0.676275	0.86497	0.587806	0.133509	0.540931	1.09245	0.252354	0.706617	1.52944	0.893461	1.27501	0.387607
67908	7302	58.79		3771.7	559	559_7302	Flavonoid	kaempferol deriv.	0.000856803	0.00432925	0.00654393	0.00314805	0.000519586	0.000850408	0.00590505	0.00569422	0.00104847	0.000358035	0.015206	0.00348825	0.0112854	0.00151356	0.00383063	0.00730407	0.00400794	0.00649294	0.00334579	0.0107782	0.0094697	0.00238279	0.0165189	0.00760707	0.00831301	0.00130975	0.0137931	0.0106018	0.0150165	0.15189	0.0119232	0.0068697	0.0126476	0.00565089	0.0840677	0.0375476	0.00672872	0.0138236	0.00361681	0.0137906	0.00403107
1382	6426	52.56	3209.62	3207.67	73	73_6426	Flavonoid	myricetin	0.427227	0.90174	3.17309	1.68034	0.324798	0.244071	5.85689	6.25775	1.11293	0.38533	12.6008	3.51439	11.9428	1.72457	4.36422	1.6868	0.258377	3.61092	2.6913	10.7056	9.2652	1.83659	17.5029	10.0738	6.04713	0.968961	7.31766	4.5617	7.91971	8.56215	7.9287	5.21675	1.05617	4.23949	6.99028	1.4258	4.01311	8.98797	4.26225	7.64466	2.37144
69415	6345	51.98	3169.07	3159.66	647	647_6345	Flavonoid	quercetin	0.0959019	0.236118	0.959013	0.576912	0.123007	0.0936639	2.12596	2.30371	0.386525	0.157714	3.54742	1.33026	3.6598	0.584492	1.27413	0.407786	0.085592	1.2584	0.850599	3.00512	2.70478	0.603774	5.57951	2.58796	1.56517	0.269377	2.12497	1.26952	2.44229	1.92999	2.17134	1.37975	0.404898	1.36946	2.66472	0.531105	1.31991	2.93427	1.60581	2.39708	0.732304
51364	6330	51.88	3154.54	3151.46	307	307_6330	Phenolic acids & their derivatives	(E)-4-caffeoylquinic acid	0.000856803	0.00432925	0.00654393	0.00314805	0.000805358	0.000850408	0.00590505	0.00862674	0.00104847	0.000358035	0.015206	0.00366266	0.0112854	0.00151356	0.00383063	0.00730407	0.000694517	0.00649294	0.00334579	0.0107782	0.0105587	0.00238279	0.0165189	0.0141491	0.00831301	0.00130975	0.0137931	0.011768	0.0223746	0.0120024	0.0119232	0.0068697	0.040844	0.0630639	0.108837	0.0164652	0.0387911	0.0478297	0.0231114	0.0319941	0.0132219
51370	6370	52.16	3177.57	3174.48	307	307_6370	Phenolic acids & their derivatives	(E)-5-caffeoylquinic acid	0.000856803	0.00432925	0.00654393	0.00314805	0.00112231	0.00153073	0.00590505	0.00956629	0.0013368	0.000588968	0.0334533	0.00582538	0.020483	0.00319361	0.00810179	0.00730407	0.000740336	0.00649294	0.00486812	0.0107782	0.0138731	0.00506342	0.0165189	0.0135406	0.00831301	0.00130975	0.0313103	0.0153727	0.0339373	0.0214243	0.019256	0.0260362	0.0849975	0.0741397	0.100437	0.0186431	0.0346529	0.068496	0.0211222	0.0504735	0.0118916
61096	4192	36.68	2135.55	2122.65	396	396_4192	Phenolic acids & their derivatives	(E)-caffeic acid	0.0334496	0.119509	0.297749	0.172844	0.032378	0.0432687	0.470839	0.222103	0.0774927	0.0173432	0.57342	0.227486	0.905654	0.0879379	0.165847	0.149332	0.00510518	0.323381	0.104924	0.60277	0.474527	0.0686719	0.989731	0.737696	0.430863	0.0564176	0.465586	1.69719	0.817049	0.977776	1.00566	1.72193	2.21854	2.32992	2.42388	0.475835	1.7497	2.13333	0.659507	4.02864	0.922207
56618	4080	35.88	2093.07	2078.95	338	338_4080	Phenolic acids & their derivatives	(E)-ferulic acid	0.017513	0.0497431	0.136245	0.0763088	0.0134079	0.0189939	0.176531	0.122654	0.0371894	0.0122806	0.202773	0.141989	0.278016	0.0408359	0.0956893	0.0566796	0.00380296	0.159045	0.0775888	0.35056	0.262121	0.0411031	0.496146	0.275946	0.208864	0.0327045	0.241379	0.246334	0.244469	0.384377	0.166567	0.308072	0.0588483	0.20038	0.322682	0.0919089	0.225883	0.442217	0.118035	0.290774	0.100898
48504	3675	33	1947.53	1928.97	293	293_3675	Phenolic acids & their derivatives	(E)-p-coumaric acid	0.0584554	0.189297	0.424538	0.361821	0.0582923	0.0282761	1.05467	0.574917	0.152343	0.0329947	0.639262	0.442293	0.593556	0.184049	0.418631	0.527135	0.0113293	0.647736	0.465232	1.28352	1.633	0.239494	2.36055	0.469242	0.77444	0.206554	1.40497	0.66447	1.07391	1.53787	0.966436	0.340325	0.0737189	0.261523	0.430098	0.100533	0.316788	1.15821	0.154763	0.547141	0.183615
51374	6412	52.46	3201	3199.34	307	307_6412	Phenolic acids & their derivatives	(Z)-1-caffeoylquinic acid	0.00748417	0.0298286	0.0557543	0.031575	0.00645585	0.00601663	0.0434021	0.0595331	0.00607591	0.00401357	0.0810482	0.0207376	0.100892	0.0128274	0.0272741	0.0397707	0.000482303	0.0213943	0.0132828	0.0535137	0.05	0.00928095	0.0764826	0.0440449	0.046636	0.0044859	0.0450345	0.0905396	0.0517319	0.10082	0.140157	0.0808221	0.00995353	0.087617	0.032367	0.0180706	0.082225	0.0603401	0.0356256	0.17645	0.0377308
51300	5767	47.88	2991.58	2840.17	307	307_5767	Phenolic acids & their derivatives	(Z)-4-caffeoyl-quinic acid	0.0530275	0.0553928	0.398067	0.16702	0.0184999	0.0101156	0.621595	0.299516	0.102593	0.0171946	0.392696	0.557178	1.11584	0.0957176	0.128901	0.209335	0.000646287	0.368085	0.124296	0.477366	0.442803	0.0421158	0.835692	0.635266	0.149094	0.0415191	0.877103	0.294943	0.509586	0.443069	0.545368	1.17637	0.19443	0.908945	0.724798	0.236598	0.529786	0.823956	0.462861	1.1844	0.248797
48466	3245	29.95	1789.44	1781.91	293	293_3245	Phenolic acids & their derivatives	(Z)-p-coumaric acid	0.0054664	0.0779266	0.131598	0.134516	0.00424761	0.00179861	0.36071	0.113913	0.0331632	0.0056301	0.0637893	0.0825843	0.10834	0.0470415	0.0985814	0.108685	0.000482303	0.123009	0.0885463	0.189642	0.454309	0.0331922	0.525054	0.107031	0.135045	0.0353568	0.390345	0.0905396	0.179973	0.422184	0.238464	0.0552324	0.0159319	0.0450376	0.0707256	0.0227625	0.0805091	0.461501	0.0311407	0.0137906	0.0317648
52107	2999	28.2	1709.76	1702.65	311	311_2999	Phenolic acids & their derivatives	2,5-dihydroxybenzaldehyde	0.0028403	0.00432925	0.00654393	0.00596556	0.00211471	0.00578277	0.0155598	0.0145203	0.00382169	0.000828851	0.015206	0.00348825	0.0304142	0.00316334	0.00383063	0.00730407	0.000482303	0.0126937	0.00485139	0.0107782	0.0223958	0.00238279	0.0165189	0.00760707	0.0182471	0.00130975	0.0137931	0.0619677	0.0258284	0.0120024	0.0280792	0.0363064	0.00644938	0.025542	0.0266842	0.0167514	0.0406078	0.0293061	0.0141417	0.0675048	0.0200747
26702	1276	15.95	1214	1238.23	179	179_1276	Phenolic acids & their derivatives	2-phenyl ethanol	0.000856803	0.00432925	0.00654393	0.00314805	0.000519586	0.000850408	0.00590505	0.00569422	0.00104847	0.000760824	0.015206	0.0107438	0.0112854	0.00151356	0.0075272	0.00730407	0.000482303	0.00649294	0.010121	0.0289394	0.0094697	0.00238279	0.0165189	0.00760707	0.00831301	0.00130975	0.0137931	0.0106018	0.0150165	0.0120024	0.0119232	0.0068697	0.00125597	0.00565089	0.0123538	0.00248907	0.00672872	0.0138236	0.00361681	0.0137906	0.00403107
35815	2299	23.22	1493.64	1495.87	223	223_2299	Phenolic acids & their derivatives	4-hydroxybenzaldehyde	0.00305022	0.0072515	0.0361225	0.0192976	0.00266028	0.00247043	0.0616487	0.0440163	0.00606542	0.00259396	0.0509402	0.0152088	0.105744	0.0126231	0.0345906	0.0371777	0.000771686	0.041847	0.0264317	0.125027	0.0705019	0.0211711	0.153626	0.0289449	0.0874529	0.0142894	0.120414	0.0535923	0.104965	0.122605	0.0842971	0.0242844	0.00814494	0.0285087	0.0368144	0.0158305	0.0343165	0.0532209	0.0115195	0.0450262	0.00403107
44715	2746	26.4	1633.29	1624.8	267	267_2746	Phenolic acids & their derivatives	4-hydroxybenzoic acid	0.0177401	0.0507822	0.0679587	0.0842891	0.00831337	0.00754312	0.169209	0.0988232	0.0253207	0.0126028	0.0801358	0.083561	0.143155	0.0238764	0.0598345	0.0653714	0.0029734	0.0799931	0.0490994	0.240677	0.145313	0.0353248	0.290815	0.128674	0.110605	0.0186574	0.164	0.0799378	0.137927	0.233867	0.112436	0.0525532	0.0481349	0.0417601	0.273822	0.0381823	0.0662779	0.121233	0.0823729	0.0739864	0.0281368
26711	2780	26.64	1644	1634.97	179	179_2780	Phenolic acids & their derivatives	4-hydroxyphenylacetic acid	0.00721856	0.00432925	0.00654393	0.00314805	0.00434893	0.003644	0.0137883	0.0235171	0.00698808	0.00386499	0.015206	0.00348825	0.0112854	0.00762078	0.0174102	0.00730407	0.000482303	0.00649294	0.0133162	0.0107782	0.0489583	0.00238279	0.0165189	0.00760707	0.00831301	0.00130975	0.0137931	0.0106018	0.0150165	0.0120024	0.0119232	0.0068697	0.00125597	0.00565089	0.0123538	0.00248907	0.00672872	0.033384	0.00361681	0.0137906	0.00403107
42424	5211	43.92	2585.41	2562.3	254	254_5211	Phenolic acids & their derivatives	4-hydroxyphenyl-beta-D-glucopyranoside	0.00656311	0.0925595	0.709068	0.1382	0.00403718	0.000850408	0.585456	0.332115	0.0233757	0.0103544	0.407218	0.132902	0.875127	0.0806426	0.207869	0.803959	0.000482303	0.244005	0.21495	0.399763	0.772964	0.285172	0.824955	0.495829	0.680379	0.157537	0.661448	0.190515	0.570102	0.822344	1.61297	0.579563	0.0176526	0.208744	0.0835118	0.0385557	0.203477	0.294097	0.0332927	0.305806	0.122988
29981	5578	46.53		2742.21	193	193_5578	Phenolic acids & their derivatives	4-hydroxyphenylethyl-b-D-glucopyranoside	0.00937342	0.192803	1.27064	0.189088	0.00357475	0.00455393	0.540341	3.21883	0.049855	0.18365	3.85671	1.13623	4.04683	0.682684	5.91205	0.76112	0.00224512	4.65129	2.99762	12.0267	5.33433	1.43993	5.84679	2.53814	2.77384	0.155363	4.10276	1.75349	2.78639	2.26101	5.23852	1.59405	0.136228	0.930673	0.778784	0.154459	0.855019	0.748341	0.224206	3.49812	0.36981
26703	1362	16.56	1251.2	1258.03	179	179_1362	Phenolic acids & their derivatives	benzoic acid	0.00918921	0.0299801	0.0516971	0.0296232	0.00446584	0.0071902	0.0554484	0.0424789	0.0104376	0.0050107	0.0844696	0.0358767	0.147895	0.0126307	0.0673043	0.0284859	0.00173629	0.0804476	0.0421067	0.212654	0.10464	0.0228152	0.19897	0.0628724	0.189495	0.0111787	0.098	0.0911227	0.143183	0.109222	0.0952665	0.0477101	0.0104685	0.039641	0.0515154	0.0196761	0.0402377	0.0671827	0.0230933	0.0732279	0.0285399
51354	6253	51.33		3106.71	307	307_6253	Phenolic acids & their derivatives	caffeoylquinic acid deriv.1	0.000856803	0.00432925	0.00654393	0.00314805	0.000519586	0.000850408	0.00590505	0.00646294	0.00104847	0.000358035	0.015206	0.00348825	0.0167024	0.00151356	0.00383063	0.00997005	0.000482303	0.00649294	0.00334579	0.0107782	0.0094697	0.00238279	0.03056	0.00760707	0.00831301	0.00130975	0.0155172	0.0106018	0.0150165	0.015123	0.0119232	0.0068697	0.0201206	0.00768521	0.0302051	0.00248907	0.00672872	0.0188692	0.00361681	0.0300634	0.00403107
51361	6303	51.69		3135.93	307	307_6303	Phenolic acids & their derivatives	caffeoylquinic acid deriv.2	0.000856803	0.00432925	0.00654393	0.00314805	0.000519586	0.000850408	0.0110424	0.00865521	0.00104847	0.000358035	0.015206	0.00348825	0.0112854	0.00151356	0.00383063	0.00730407	0.000482303	0.00649294	0.00334579	0.0107782	0.0094697	0.00238279	0.0165189	0.00760707	0.00831301	0.00148002	0.013931	0.0106018	0.0157673	0.0158432	0.0256945	0.0068697	0.0114984	0.00565089	0.0123538	0.00248907	0.00884827	0.0138236	0.00361681	0.0137906	0.00403107
57474	6230	51.17	3101.6	3093.81	345	345_6230	Phenolic acids & their derivatives	chlorogenic acid	0.000856803	0.0459334	0.0196972	0.00314805	0.000605317	0.000850408	0.0154417	0.00933852	0.00172998	0.000864654	0.015206	0.00348825	0.0112854	0.00151356	0.0232136	0.0358265	0.000482303	0.021167	0.0285228	0.0464001	0.0267992	0.00238279	0.151313	0.0298958	0.00831301	0.00130975	0.128759	0.0106018	0.0150165	0.0562312	0.0994992	0.0068697	1.05114	0.076061	0.0123538	0.00248907	0.0377818	0.0138236	0.00361681	0.0137906	0.00403107
1388	6541	53.38	3329	3276.79	73	73_6541	Phenolic acids & their derivatives	ellagic acid	0.392844	0.747879	2.04331	1.24271	0.411756	0.460105	3.08427	2.78467	0.865364	0.221421	4.60591	2.64415	4.99582	1.20266	2.09572	2.97615	0.219214	3.49833	2.46128	7.30152	6.36842	1.54907	14.53	4.15658	4.35182	0.784201	6.10469	7.61487	8.36803	10.27	6.72046	5.49545	1.16454	5.66999	8.77769	2.28285	6.31595	14.7067	4.99773	14.3205	3.94158
1197	3715	33.29	1945.87	1943.57	73	73_3715	Phenolic acids & their derivatives	gallic acid	1.1845	6.39686	12.1339	6.8813	1.31188	1.65678	12.1718	12.8733	3.57575	0.913764	26.5719	9.38175	27.4892	3.68523	9.34999	20.3966	0.909706	14.3359	8.98233	25.5525	23.1014	5.70705	47.8028	16.1852	17.9744	2.91095	29.4964	24.4133	33.6613	34.7129	26.8967	18.9193	3.63782	14.1779	27.579	6.35382	15.9812	45.9057	18.1587	33.3983	10.6166
46883	3522	31.92	1840	1875.56	281	281_3522	Phenolic acids & their derivatives	gallic acid methyl ester	0.136279	0.332314	0.735963	0.302323	0.0897584	0.101441	0.942239	0.856354	0.130561	0.0645322	0.812687	0.652303	1.8872	0.188696	0.269638	1.12264	0.0197093	0.666858	0.448637	1.04505	0.917188	0.189694	2.21031	0.32254	0.528666	0.0793448	0.609448	0.878627	1.31342	1.25977	0.500715	1.1075	0.137315	0.853764	0.669577	0.254731	0.627049	2.2238	0.449588	1.54675	0.380754
39131	2652	25.73	1598.07	1596.74	239	239_2652	Phenolic acids & their derivatives	hydroxyquinol	0.00151654	0.0104984	0.0258485	0.009696	0.00159773	0.00219405	0.0239154	0.0204423	0.00498025	0.00191907	0.0415885	0.0191156	0.0470602	0.00734834	0.0188276	0.0247608	0.00243322	0.0399641	0.0184018	0.0522203	0.0431345	0.00905459	0.110181	0.0422953	0.0424379	0.00564503	0.0784828	0.0561367	0.0810141	0.10076	0.0792298	0.0483627	0.00917483	0.0397257	0.0641781	0.0160296	0.0361332	0.0857755	0.0283377	0.064333	0.0248918
29903	3329	30.54	1812.68	1809.45	193	193_3329	Phenolic acids & their derivatives	protocatechuic acid	0.0199978	0.0320798	0.0554925	0.0318583	0.0173594	0.0189939	0.0841469	0.0591345	0.0194125	0.00818647	0.0904759	0.0327721	0.131701	0.0367417	0.0368507	0.0569717	0.00373303	0.0678513	0.0517928	0.12632	0.118845	0.0206826	0.123396	0.0648503	0.0500028	0.0125998	0.109379	0.342174	0.119607	0.184597	0.114999	0.296531	0.0430985	0.278561	0.139166	0.103533	0.205663	0.243641	0.115593	0.525214	0.134315
26710	2559	25.07	1575.25	1569.57	179	179_2559	Phenolic acids & their derivatives	p-tyrosol	0.00405268	0.12005	0.235058	0.141285	0.00166267	0.00275107	0.173372	0.84246	0.0269143	0.0787211	0.201252	0.317012	0.398657	0.153679	0.891236	0.0332335	0.000482303	0.686239	0.3581	1.8352	1.63774	0.100244	0.623093	0.315998	0.120289	0.0124492	0.404483	0.105329	0.415432	0.418044	0.662931	0.114106	0.0251633	0.0579781	0.113902	0.027666	0.0946731	0.370887	0.0375425	0.0696424	0.0721964
57300	3435	31.3	1842.69	1845.56	345	345_3435	Phenolic acids & their derivatives	quinic acid	0.108793	0.2038	2.26898	0.654496	0.142039	0.0677647	1.98619	4.22708	0.311827	0.408532	5.53508	1.71066	8.66635	1.25687	2.07611	0.667957	0.00371856	5.50706	1.99727	30.2942	6.04654	1.40503	23.929	1.1263	11.6837	1.52322	8.00697	3.36757	4.09876	27.1653	4.66806	2.98794	1.90118	1.62522	2.92174	0.485655	2.71077	2.7086	1.49477	1.35768	0.661115
49287	3845	34.21		1990.62	297	297_3845	lignin and neolignan glycosides	(±)-threo-guaiacylglycerol	0.0293583	0.0818013	0.10274	0.087752	0.0337757	0.0147971	0.12501	0.0700389	0.03093	0.0101145	0.0233413	0.0532481	0.0387089	0.0218331	0.0756359	0.0274268	0.000764451	0.0730781	0.0310656	0.167709	0.158428	0.0113421	0.145614	0.0404696	0.0362447	0.00732806	0.0552414	0.0488744	0.0986585	0.0957191	0.0702277	0.0274101	0.0179415	0.0229709	0.101672	0.0506899	0.0562857	0.254009	0.0335459	0.055507	0.0576442
49326	5704	47.43		2807.14	297	297_5704	lignin and neolignan glycosides	guaiacyl deriv.1	0.00184213	0.025153	0.116155	0.0247752	0.00166787	0.000850408	0.0402429	0.0324855	0.00252158	0.000950583	0.103629	0.00791833	0.0385961	0.00653859	0.0431521	0.0422175	0.000677636	0.0489893	0.0379078	0.105572	0.0693655	0.0251503	0.134051	0.0644699	0.0388218	0.0100262	0.181103	0.0247023	0.118856	0.0618124	0.0556218	0.0198191	0.00216654	0.0181959	0.0235958	0.0101803	0.0337782	0.0377385	0.00904203	0.0370277	0.013887
49348	5902	48.83		2911.2	297	297_5902	lignin and neolignan glycosides	guaiacyl deriv.2	0.00311876	0.0903082	0.788184	0.155718	0.00806137	0.000850408	0.328084	0.241065	0.0191871	0.00406012	0.401135	0.0434462	0.452883	0.0440522	0.45326	0.273537	0.000754805	0.48314	0.202454	0.91205	0.559233	0.158825	0.881119	0.391764	0.337633	0.088572	1.27766	0.341326	1.15379	0.510702	0.286276	0.245248	0.0189462	0.176364	0.136695	0.101716	0.374184	0.407313	0.0642888	0.676152	0.189117
61253	6640	54.08	3377.2	3336.98	396	396_6640	Steroids	beta-sitosterol	0.000856803	0.0443316	0.0478034	0.0170467	0.00475421	0.000850408	0.035076	0.0387207	0.00104847	0.0033888	0.0824167	0.0188191	0.0903397	0.00151356	0.0366592	0.00730407	0.00350876	0.0585014	0.0181676	0.0868183	0.0920455	0.0213974	0.127113	0.0461369	0.0524135	0.0108709	0.126966	0.0623918	0.0849184	0.0862372	0.0626565	0.0482253	0.00846521	0.0265874	0.0123538	0.00248907	0.00672872	0.067321	0.0203988	0.0709525	0.00403107
60372	6381	52.24		3181.09	375	375_6381	Steroids	sterol1	0.0166348	0.0459334	0.186829	0.0578612	0.0162916	0.00416275	0.255866	0.138341	0.0196589	0.0192014	0.168711	0.096485	0.369541	0.0640161	0.205284	0.13633	0.000482303	0.266243	0.0933475	0.559927	0.450521	0.0862569	0.398023	0.144953	0.216637	0.0681137	0.216828	0.142595	0.280283	0.663373	0.294861	0.101122	0.00847149	0.0744222	0.054295	0.0322832	0.0895929	0.169823	0.0521544	0.157075	0.0374889
60377	6475	52.91		3236.99	375	375_6475	Steroids	sterol2	0.0212273	0.0568864	0.191803	0.078481	0.0174737	0.0150097	0.17913	0.127465	0.0280781	0.016244	0.139135	0.0915317	0.242523	0.0532244	0.119248	0.0742093	0.000482303	0.16096	0.0693414	0.294083	0.172538	0.04762	0.404218	0.14153	0.141113	0.0388734	0.181448	0.317154	0.182451	0.475055	0.129784	0.308072	0.0357259	0.192893	0.281976	0.0909879	0.205562	0.352779	0.0913426	0.293394	0.0784445
18925	4282	37.32	2169.13	2158.27	143	143_4282	Diterpens	(E)-phytol	0.094908	0.376126	0.520406	0.375783	0.084747	0.0801254	0.491713	0.437031	0.10057	0.0846717	0.826752	0.40155	1.76295	0.129099	0.524395	0.397414	0.0913025	0.749253	0.442347	1.1316	0.750663	0.140668	3.29866	1.77351	0.827228	0.0811784	1.5489	0.643955	1.97715	1.23703	1.93693	0.495546	0.0915787	0.291925	0.73462	0.244675	0.432253	0.726016	0.305693	0.535901	0.322868
31708	7121	57.5	3559.97	3647.29	203	203_7121	Teriterpenes	oleanolic acid	0.0302494	0.436973	0.745485	0.423555	0.103208	0.10628	0.918176	0.349796	0.128899	0.0150912	0.727457	0.254799	1.28451	0.178842	0.195994	0.699072	0.033373	0.50158	0.488652	0.553675	0.663116	0.31118	1.71689	0.134303	1.20593	0.108611	1.6211	1.25176	0.963985	1.10302	0.598605	1.3309	0.185311	0.926548	1.84714	0.589486	1.1779	2.18772	0.558671	1.65618	0.557839
67007	6966	56.4		3544.46	496	496_6966	Teriterpenes	oleanolic acid deriv.1	0.000856803	0.00432925	0.0391654	0.0293713	0.00606616	0.10045	0.0716282	0.00569422	0.0193181	0.000358035	0.015206	0.0105345	0.0112854	0.00712887	0.00383063	0.00730407	0.00208837	0.0392174	0.00334579	0.017784	0.0094697	0.00238279	0.0165189	0.00760707	0.0379905	0.00130975	0.0286207	0.750822	0.0150165	0.0331266	0.0119232	1.14576	0.141453	0.542542	1.8527	0.274295	0.703454	0.398466	0.150622	1.46394	0.279595
67008	7061	57.07		3606.74	496	496_7061	Teriterpenes	oleanolic acid deriv.2	0.00958334	0.019828	0.181365	0.161149	0.0242595	0.0778463	0.305439	0.0394894	0.0411684	0.00301286	0.015206	0.0982989	0.220009	0.0355157	0.00383063	0.173216	0.00782779	0.193587	0.0420733	0.0403643	0.080303	0.0486803	0.0165189	0.00760707	0.163642	0.0165553	0.0555862	0.260169	0.0150165	0.338588	0.243055	0.515949	0.0963828	0.313087	1.13179	0.137309	0.435954	0.834117	0.0568563	0.527282	0.127422
31714	7250	58.42	3608.85	3735.59	203	203_7250	Teriterpenes	ursolic acid	0.00819532	0.0437255	0.138339	0.0439626	0.0112568	0.0718807	0.0902586	0.0521591	0.0423374	0.00529534	0.161944	0.0857586	0.296073	0.023218	0.02714	0.205719	0.00601915	0.107621	0.0532817	0.059765	0.140057	0.0721984	0.229943	0.0416487	0.1057	0.0373934	0.208759	0.636587	0.209255	0.208182	0.159115	0.469819	0.105074	0.408079	0.811769	0.217756	0.504587	0.685789	0.320106	0.640158	0.291587
47712	4281	37.31		2157.7	290	290_4281	Other components	5-hydroxyindol-3-acetic acid	0.00526505	0.00432925	0.0390673	0.00821642	0.00962792	0.000914188	0.0294071	0.0328272	0.00294097	0.0455027	0.0933651	0.00348825	0.107889	0.0260787	0.0591258	0.00730407	0.00846925	0.0750909	0.052027	0.355572	0.175473	0.0374336	0.412064	0.00760707	0.174116	0.0319579	0.100345	0.0106018	0.0150165	0.0870174	0.0119232	0.0068697	0.00125597	0.00565089	0.0123538	0.00248907	0.00672872	0.0138236	0.00361681	0.0137906	0.00403107
64456	5015	42.53	2501.03	2471.35	446	446_5015	Other components	A252002	0.0103502	0.0428163	0.0384456	0.0679192	0.00869267	0.00705413	0.0424278	0.00569422	0.0266417	0.00273181	0.015206	0.0278537	0.0112854	0.00877866	0.0465231	0.00730407	0.000482303	0.0473336	0.0347962	0.0613279	0.0535511	0.00238279	0.291807	0.0971042	0.0537436	0.00859197	0.0137931	0.0106018	0.0150165	0.170554	0.0119232	0.0495649	0.00508038	0.00565089	0.0123538	0.0212069	0.00672872	0.226016	0.0362947	0.0137906	0.0187848
58037	5601	46.7	2756.45	2754.36	355	355_5601	Other components	A278005	0.00357287	0.0790738	0.412104	0.209833	0.00310972	0.000850408	0.362806	0.268169	0.0212473	0.0269206	0.218055	0.108711	0.947805	0.0637815	0.173528	0.0190271	0.00176764	0.885962	0.300502	0.562298	0.349053	0.191219	0.735092	0.183863	0.272417	0.0717351	0.292552	0.106601	0.671088	0.314703	0.25462	0.341493	0.0365988	0.100755	0.114273	0.0817659	0.0901312	0.276334	0.0424614	0.323665	0.0653033
55362	3512	31.85	1875.07	1872.14	331	331_3512	Other components	allantoin	0.00584768	0.00432925	0.151557	0.0643305	0.00266807	0.00640782	0.0973447	0.0588498	0.00965645	0.00853376	0.237214	0.0689627	0.178761	0.0276603	0.0926056	0.156709	0.0104732	0.0132456	0.0576479	0.270802	0.189867	0.0437361	0.333269	0.166975	0.168629	0.0265814	0.316414	0.0106018	0.0150165	0.289258	0.204066	0.0221548	0.0240769	0.0835201	0.113161	0.0426377	0.109644	0.0478988	0.0396402	0.209892	0.0829593
42057	3240	29.91		1780.06	253	253_3240	Other components	aromatic1	0.0050123	0.00432925	0.0719505	0.0436005	0.00431516	0.00842329	0.0608515	0.0661099	0.0100496	0.00613493	0.166962	0.0367836	0.237501	0.011102	0.0457952	0.0920678	0.00185446	0.08285	0.0565438	0.114734	0.112784	0.0295823	0.373988	0.153663	0.173784	0.0186574	0.203517	0.174771	0.211583	0.222705	0.341242	0.121491	0.0103303	0.0459982	0.0683784	0.0278029	0.0591455	0.100843	0.035933	0.167004	0.0602644
49409	6469	52.87		3233.63	297	297_6469	Other components	aromatic10	0.00504228	0.00846369	0.0277463	0.0151579	0.0045178	0.00346966	0.0469451	0.033482	0.0057404	0.00181524	0.0666785	0.0142321	0.042151	0.00701536	0.0235776	0.031444	0.00261167	0.03912	0.0179167	0.0780341	0.056108	0.00903076	0.0596333	0.0349164	0.0295112	0.00426324	0.0502759	0.0363643	0.0555611	0.0794559	0.0389293	0.0348294	0.00558277	0.024101	0.0340348	0.00792768	0.0326679	0.0579209	0.0268548	0.0521283	0.0160235
67460	3831	34.11		1985.45	531	531_3831	Other components	aromatic2	0.00571916	0.0215813	0.0591899	0.0280334	0.0055154	0.006259	0.0859775	0.0824808	0.0166707	0.00733972	0.181864	0.0759218	0.271414	0.0372639	0.112985	0.00730407	0.00844031	0.124178	0.0913065	0.276029	0.269981	0.0605347	0.489786	0.201549	0.171581	0.0309494	0.287931	0.198519	0.284263	0.369854	0.260224	0.157282	0.0327556	0.122511	0.242505	0.0642553	0.12872	0.339162	0.219504	0.2805	0.0919285
58025	4622	39.74		2298.43	355	355_4622	Other components	aromatic3	0.00280603	0.0125332	0.00654393	0.00314805	0.000519586	0.000850408	0.00590505	0.0204138	0.00104847	0.00334942	0.015206	0.02079	0.0642704	0.00840027	0.0422711	0.0177489	0.000482303	0.0946347	0.021664	0.171211	0.0474905	0.00238279	0.0679753	0.00760707	0.0362863	0.00130975	0.0603448	0.0106018	0.060892	0.0120024	0.0119232	0.0068697	0.00339739	0.00565089	0.0123538	0.00248907	0.00672872	0.0138236	0.00361681	0.0137906	0.00403107
49298	5200	43.84		2556.97	297	297_5200	Other components	aromatic4	0.00743276	0.112063	0.0590263	0.0337786	0.00750282	0.0074028	0.0510491	0.0378666	0.00779541	0.00365017	0.0551979	0.0197958	0.0617876	0.0102847	0.030262	0.0269885	0.00253933	0.0420418	0.0167791	0.0557232	0.0602746	0.0145469	0.0901107	0.037693	0.0581495	0.0101964	0.0686207	0.113705	0.0717039	0.0832366	0.0658758	0.0425578	0.0124592	0.0585432	0.0547892	0.0200743	0.0891219	0.118192	0.0246486	0.122391	0.042165
65299	5869	48.6		2893.84	456	456_5869	Other components	aromatic5	0.0203962	0.314087	0.518476	0.0606	0.00933176	0.00263201	0.125866	0.0382367	0.0107993	0.000358035	1.85879	0.016325	0.0112854	0.0108371	0.00383063	0.894018	0.00202567	0.295591	0.0511069	0.126428	0.342424	0.131673	0.116211	0.00760707	0.0997562	0.07628	0.0650345	0.104375	0.142206	0.0870774	0.0119232	0.247241	0.0108578	0.316365	0.0573217	0.0166643	0.256734	0.168372	0.0323524	6.11108	0.161364
51787	5896	48.79		2908.17	308	308_5896	Other components	aromatic6	0.00880365	0.526849	1.30139	0.545762	0.00831597	0.014036	1.66242	1.34591	0.178665	0.0334798	1.52129	1.16045	3.54667	0.371156	1.09866	1.46279	0.0020305	1.6058	1.04271	2.02161	1.91482	0.680607	5.58315	1.10188	2.59711	0.754306	3.97448	1.50636	3.41596	5.52633	2.31513	2.04896	0.188326	1.24743	0.891822	0.417479	1.40984	4.00947	0.349131	1.40098	0.526296
49349	5910	48.89		2915.74	297	297_5910	Other components	aromatic7	0.00735137	0.246421	1.95255	0.375012	0.022298	0.00387786	0.717197	0.431166	0.0466886	0.00700137	0.848345	0.100706	0.758605	0.0823377	0.849884	0.583376	0.00076204	0.933296	0.51122	1.96077	1.21378	0.363697	2.13961	0.863326	0.648207	0.190602	2.86179	0.895272	2.66175	0.94993	0.54811	0.580456	0.0399523	0.412882	0.300074	0.244389	0.796815	0.788499	0.168778	1.36044	0.417639
49354	5967	49.3		2946.99	297	297_5967	Other components	aromatic8	0.00146942	0.0243953	0.172465	0.0328657	0.00231735	0.00130538	0.0517577	0.0312043	0.0038112	0.000839592	0.123169	0.00983687	0.0643268	0.00893758	0.0645654	0.0742093	0.000482303	0.0549628	0.049066	0.157793	0.0736742	0.0502291	0.171301	0.0599817	0.0636361	0.0158611	0.309862	0.237481	0.223221	0.0870174	0.0597353	0.186822	0.00729088	0.11751	0.0838206	0.0470683	0.212493	0.0968344	0.0455176	0.547486	0.100515
60011	6264	51.41		3113.18	369	369_6264	Other components	aromatic9	0.0203019	0.0551331	0.166249	0.0935129	0.0139327	0.0173738	0.235611	0.220736	0.042285	0.0131596	0.432384	0.136234	0.503386	0.069533	0.14972	0.44752	0.01969	0.280722	0.174215	0.520155	0.43679	0.115899	1.13369	0.359168	0.357875	0.0692204	0.610621	0.520497	0.79963	0.766293	0.543639	0.347847	0.0660512	0.30204	0.495635	0.119202	0.366446	0.743848	0.278368	0.673531	0.191959
26707	2254	22.9	1461.65	1483.47	179	179_2254	Other components	mandelic acid	0.00325157	0.0121219	0.0326215	0.0262705	0.00262651	0.00249169	0.0302338	0.00569422	0.00564604	0.00234155	0.015206	0.0193772	0.109073	0.00560018	0.0334797	0.00730407	0.000482303	0.0385032	0.0188535	0.0107782	0.034375	0.00723176	0.183773	0.0583082	0.0545749	0.00130975	0.0693103	0.0534862	0.0726049	0.0120024	0.0690354	0.068594	0.00656242	0.00565089	0.0123538	0.0124702	0.00672872	0.073196	0.0173245	0.0137906	0.00403107
60402	4406	38.2		2208.22	376	376_4406	Other components	NA1	0.000856803	0.122128	1.26386	0.175897	0.00191467	0.000850408	0.477098	0.0944102	0.0391133	0.00222877	1.02686	0.033557	1.45288	0.156926	0.627439	0.00730407	0.000482303	0.493561	0.263347	1.37594	1.16037	0.265895	2.76081	0.915435	1.10272	0.19552	3.09055	0.621903	0.642632	0.839448	1.07607	0.552118	0.00742904	0.527906	0.0167394	0.140259	0.258282	0.849184	0.0558978	0.279121	0.198208
64454	4970	42.21		2450.87	446	446_4970	Other components	NA2	0.193899	1.03476	0.924363	0.741681	0.0806059	0.0392633	0.545095	0.507526	0.423405	0.0273861	0.275001	0.467757	1.01789	0.219671	0.705354	0.411292	0.00371615	0.473433	0.520471	1.403	1.01236	0.254637	2.50551	0.869108	0.644342	0.129318	0.868483	0.472312	0.522049	2.61064	1.2052	1.04018	0.071747	0.554493	0.281852	0.284637	0.581092	4.24364	0.279073	0.332284	0.256194
55454	5156	43.53		2536.45	331	331_5156	Other components	NA3	0.11174	0.131198	0.356971	0.500273	0.160887	0.148026	0.665292	0.108959	0.158802	0.00414067	0.56346	0.35418	1.01529	0.0783419	0.0683002	0.293368	0.0391606	0.256893	0.346322	0.197887	0.212642	0.112313	2.37864	0.159102	0.815049	0.122069	1.07966	0.582253	0.798053	2.04497	1.1547	0.570426	0.0875283	0.185603	0.440043	0.154969	0.281261	1.32562	0.110602	0.464328	0.139858
52837	5278	44.4		2594.48	317	317_5278	Other components	NA4	0.0559321	0.0840958	0.305569	0.26727	0.0418422	0.0857806	0.453891	0.261507	0.0741534	0.0238415	0.494272	0.147972	0.585656	0.088339	0.335583	0.337484	0.00979076	0.386298	0.277098	1.08806	0.70483	0.0821704	1.45945	0.78349	0.365856	0.0485001	0.525655	0.639078	0.846031	0.832006	0.515441	0.303194	0.0851482	0.250165	0.620285	0.253736	0.446518	0.918717	0.471921	0.354487	0.295961
1343	5680	47.26		2794.76	73	73_5680	Other components	NA5	0.160659	0.512324	1.21805	0.864015	0.146305	0.276952	1.62176	1.20282	0.328414	0.103671	1.2561	0.667058	2.43708	0.373343	1.90047	1.42312	0.103758	2.37716	1.16356	4.45786	3.62855	0.521473	4.52147	1.55656	1.44056	0.26658	2.09717	1.60703	2.05178	3.10184	2.83152	1.33664	0.229672	0.887642	1.00375	0.613842	1.15118	2.17162	0.516661	2.09196	0.822559
60007	6061	49.97		2998.78	369	369_6061	Other components	NA6	0.0166091	0.0851131	0.200408	0.106577	0.0168112	0.0214855	0.23133	0.24377	0.046762	0.0144324	0.550763	0.147745	0.564327	0.0766922	0.197431	0.440399	0.0285065	0.377305	0.202069	0.676331	0.608759	0.148483	1.30351	0.48845	0.458172	0.0877665	0.742759	0.687953	0.952948	0.99806	0.704364	0.467037	0.0880244	0.427038	0.691134	0.164465	0.447157	0.937794	0.404052	0.859497	0.234104
25617	2538	24.92	1573.09	1563.47	174	174_2538	Other components	phenethylamine	0.000856803	0.00432925	0.00654393	0.00314805	0.000519586	0.000850408	0.00590505	0.00569422	0.00104847	0.00342818	0.015206	0.00348825	0.0112854	0.00151356	0.0500089	0.00730407	0.000482303	0.120542	0.0688898	0.0628368	0.0325758	0.00238279	0.163207	0.0569389	0.0530786	0.00130975	0.0982069	0.0432555	0.185379	0.0120024	0.120603	0.0508702	0.00748556	0.0278306	0.0415706	0.0207837	0.0372771	0.101534	0.0346129	0.0137906	0.00403107
34407	2736	26.33	1629.33	1621.85	218	218_2736	Other components	phenylalanine	0.100721	1.12426	1.37213	1.25853	0.0369348	0.0603109	1.63989	2.31832	0.967186	0.192902	0.249151	3.36808	3.40526	0.459623	1.40008	0.0490833	0.0044396	1.82825	1.64051	2.04247	1.94176	0.311728	13.2515	5.46435	1.82924	0.586343	1.21414	3.73487	2.71491	2.89618	5.17283	3.97488	1.93185	1.5297	9.51268	1.58912	2.30661	10.1417	2.78666	0.268089	1.83341
1154	3300	30.34	1792.47	1800.07	73	73_3300	Other components	shikimic acid	0.0733766	1.14615	12.8594	2.31755	0.0317051	0.103703	3.95192	2.21343	0.443672	0.082135	17.0148	0.594625	9.21448	2.40873	6.16319	10.8571	0.000482303	3.22625	3.11797	23.2757	18.7684	1.94245	10.7804	7.23775	3.70465	1.31836	26.9162	20.4881	5.58171	10.3405	7.53929	14.5637	2.1255	16.9177	5.8137	5.54609	11.4296	11.9482	5.43818	27.2545	5.71053
15496	4270	37.23	2185.81	2153.22	130	130_4270	Other components	tryptophan	0.0217799	0.457667	0.215099	0.367992	0.0112776	0.0184496	0.28734	1.06764	0.252446	0.115092	0.0456181	1.87026	1.20342	0.134783	0.183966	0.0220583	0.00144691	0.18362	0.128478	0.068172	0.124242	0.014261	1.80254	1.74267	0.119998	0.0358414	0.0867586	0.179012	0.170888	0.0607922	0.247347	1.01919	0.764739	0.120307	7.31988	0.506762	0.363856	1.38457	0.947731	0.0470258	0.0971688
34465	3665	32.93	1932.6	1925.46	218	218_3665	Other components	tyrosine	0.0427544	0.296143	0.743227	0.472727	0.0375193	0.0177395	0.962168	0.818943	0.257411	0.0646862	0.475189	0.89723	2.87242	0.167869	0.288198	0.0792126	0.00398624	0.721561	0.366247	0.280448	0.419697	0.177172	5.21799	1.85985	1.3731	0.193287	1.36883	1.91649	2.72084	0.210942	1.96906	1.34801	0.273487	0.245305	1.47931	0.280431	0.541729	2.59566	0.854851	0.686701	0.476915
39482	1717	19.09	1335.3	1343.56	241	241_1717	Other components	uracil	0.00328584	0.00658047	0.0274845	0.0169365	0.00192507	0.00463472	0.0243583	0.0206985	0.0038112	0.00200142	0.015206	0.00348825	0.235696	0.0039731	0.0262207	0.00730407	0.000482303	0.0331789	0.038142	0.0137961	0.0136837	0.00238279	0.365068	0.0698709	0.0569026	0.00664699	0.0156552	0.224494	0.115928	0.0120024	0.0119232	0.0548889	0.00125597	0.0171787	0.0123538	0.0179337	0.0430975	0.0138236	0.0351735	0.0137906	0.0295074
54785	4919	41.85		2428.04	325	325_4919	Other components	xanthosine	0.0266765	0.642418	1.36104	0.639291	0.0111841	0.00676924	0.763464	0.621182	0.307476	0.0251341	0.365629	0.451554	1.53115	0.46256	1.6272	0.0525893	0.000482303	0.761947	0.940986	2.9398	2.33475	0.528728	5.36807	1.18298	1.22625	0.235487	1.80138	1.19488	0.815547	9.37682	2.76935	1.34468	0.0917043	1.20392	0.324596	0.418624	1.09893	7.44906	0.506408	0.728556	0.642552
6503	1563	17.99	1303	1305.68	91	91_1563	Plant hormone	phenylacetic acid	0.000856803	0.00432925	0.00654393	0.00314805	0.000600122	0.00123734	0.00918235	0.00717472	0.00360151	0.000803788	0.015206	0.00800553	0.0112854	0.00151356	0.0057268	0.00730407	0.000482303	0.00649294	0.00334579	0.0107782	0.0094697	0.00238279	0.0343593	0.00760707	0.00831301	0.00232481	0.0137931	0.0227939	0.0174192	0.0120024	0.0231907	0.0068697	0.00453404	0.00565089	0.0123538	0.00271309	0.00672872	0.0174177	0.0055518	0.0137906	0.00786058
									2.9545	13.4827	33.4869	16.4186	3.00868	3.58598	33.132	33.5145	7.3719	2.5134	57.1267	22.4751	70.9691	10.1422	30.4263	36.9541	1.58915	43.396	25.4137	102.244	63.965	15.2941	136.851	38.7974	53.417	8.70483	76.9152	55.2967	74.6485	105.992	66.2747	48.3451	12.667	36.7579	58.399	15.3135	41.1383	96.5915	32.0547	83.5683	23.6735
									0.162994	0.839531	1.62194	0.90694	0.178512	0.223821	1.63617	1.80589	0.476477	0.132289	3.55069	1.27513	3.77011	0.523606	1.46107	2.66513	0.121548	2.08294	1.26857	5.31066	3.21968	0.793646	7.0672	2.1722	2.79821	0.436296	4.02697	3.30156	4.49386	5.76682	3.64945	2.55611	0.613382	1.97492	3.73495	0.867818	2.22265	6.21062	2.42859	4.71854	1.45391
*RT, LRI, LRI cal,denote the retention time, linear retention index, calculated LRI, respectively
[truncated: 6 more columns]

## Sheet: Table S2
Table S2. Bioclimatic variables extracted from WorldClim 2 databases for natural populations of Epilobium hirsutum and E. parviflorum
Species	Pop ID	bio_1	bio_2	bio_3	bio_4	bio_5	bio_6	bio_7	bio_8	bio_9	bio_10	bio_11	bio_12	bio_13	bio_14	bio_15	bio_16	bio_17	bio_18	bio_19	alt		Bioclimatic variables
E. hirsutum	EPH1	16.6125	7.70833	28.8702	718.958	30.4	3.7	26.7	13.5333	22.9167	25.4	8.11667	983	178	24	61.4795	454	87	110	301	14.6		BIO1 = Annual Mean Temperature
E. hirsutum	EPH2	15.2958	8.14167	30.7233	696.819	29.2	2.7	26.5	17.2167	21.4167	23.7	6.96667	1091	214	33	59.5013	497	118	126	255	88		BIO2 = Mean Diurnal Range (Mean of monthly (max temp - min temp))
E. hirsutum	EPH3	16.9833	9.8	33.4471	754.277	32.3	3	29.3	8.33333	25.9667	26.0833	7.9	407	65	7	52.8294	168	28	39	143	237.4		BIO3 = Isothermality (BIO2/BIO7) (×100)
E. hirsutum	EPH4	14.825	9.53333	32.2072	774.786	30.3	0.7	29.6	9.2	24.0167	24.0167	5.18333	321	55	5	58.5945	139	21	21	113	641		BIO4 = Temperature Seasonality (standard deviation ×100)
E. hirsutum	EPH6	14.4458	11.3417	34.5783	839.671	31.8	-1	32.8	8.61667	24.5333	24.5333	3.93333	277	52	3	68.8563	131	14	14	101	936.1		BIO5 = Max Temperature of Warmest Month
E. hirsutum	EPH7	13.7542	9.225	30.6478	804.415	29	-1.1	30.1	12.8333	23.4333	23.4333	3.7	273	43	8	46.3375	110	29	29	80	1190.8		BIO6 = Min Temperature of Coldest Month
E. hirsutum	EPH8	11.2625	11.9083	32.1847	924.353	30.3	-6.7	37	10.8167	21.9	22.2333	-0.666667	299	52	5	58.2963	138	21	35	68	1222.4		BIO7 = Temperature Annual Range (BIO5-BIO6)
E. hirsutum	EPH9	9.1125	11.8583	35.8258	736.892	26.8	-6.3	33.1	8.11667	17.6333	17.75	-0.3	413	53	13	37.9477	151	56	57	88	1432.7		BIO8 = Mean Temperature of Wettest Quarter
E. hirsutum	EPH10	11.5042	12.225	35.1293	830.852	30.9	-3.9	34.8	5.16667	21.5333	21.5333	1.3	390	61	10	51.1755	151	33	33	119	1436		BIO9 = Mean Temperature of Driest Quarter
E. hirsutum	EPH11	9.52917	10.775	31.0519	859.962	28	-6.7	34.7	13.2667	19.7333	19.8833	-1.16667	431	75	17	49.2547	183	62	85	69	1470.8		BIO10 = Mean Temperature of Warmest Quarter
E. hirsutum	EPH12	12.8625	13.0417	34.5933	905.529	33.1	-4.6	37.7	6.65	23.4333	23.8667	1.56667	350	60	5	60.8264	143	17	20	122	1544		BIO11 = Mean Temperature of Coldest Quarter
E. hirsutum	EPH13	10.725	10.1167	29.2389	908.534	28.8	-5.8	34.6	4.55	21.5833	21.5833	-0.733333	374	56	9	47.4786	136	33	33	116	1553		BIO12 = Annual Precipitation
E. hirsutum	EPH14	11.6708	12.5917	36.4976	807.43	30.7	-3.8	34.5	5.5	21.4	21.4	1.78333	395	60	10	49.3916	146	34	34	122	1585.4		BIO13 = Precipitation of Wettest Month
E. hirsutum	EPH15	8.10417	11.8417	34.8284	776.523	26.2	-7.8	34	6.91667	17.0667	17.3	-1.7	390	58	15	40.1399	153	52	61	80	1710		BIO14 = Precipitation of Driest Month
E. hirsutum	EPH16	9.425	11.95	31.1198	983.034	30.4	-8	38.4	7.21667	21.1167	21.3	-2.75	442	84	3	73.2396	214	10	17	137	1719.3		BIO15 = Precipitation Seasonality (Coefficient of Variation)
E. hirsutum	EPH17	15.2083	15.0333	38.4484	892.308	35.8	-3.3	39.1	4.1	25.4167	26.1333	4.1	249	54	0	93.1196	134	3	4	134	1722		BIO16 = Precipitation of Wettest Quarter
E. hirsutum	EPH18	10.5333	10.3833	31.5603	831.64	28.1	-4.8	32.9	9.15	20.4833	20.4833	0.166667	434	61	13	42.1819	150	45	45	124	1745		BIO17 = Precipitation of Driest Quarter
E. hirsutum	EPH19	9.59167	10.8	27.9793	1008.36	29.9	-8.7	38.6	8.2	21.6	21.6333	-3.11667	287	50	5	57.3087	132	21	35	62	1747.6		BIO18 = Precipitation of Warmest Quarter
E. hirsutum	EPH20	11.9583	14.9	38.8021	869.647	33.2	-5.2	38.4	2.06667	22.4333	22.85	1.43333	374	70	0	80.6422	179	2	8	161	1760		BIO19 = Precipitation of Coldest Quarter
E. hirsutum	EPH21	9.07083	11.475	30.1181	971.502	29.3	-8.8	38.1	7.4	20.6167	20.6167	-3.2	491	86	5	66.055	218	16	16	154	1778.9		alt=altitude (masl)
E. hirsutum	EPH22	7.60833	11.9333	32.7839	877.576	27	-9.4	36.4	6.21667	17.6333	17.9333	-3.46667	304	55	10	51.9254	136	34	42	62	1846.6
E. hirsutum	EPH23	13.825	14.1167	37.2471	885.421	33.5	-4.4	37.9	2.75	23.9	24.65	2.75	235	48	0	91.5364	125	4	5	125	1921.8
E. hirsutum	EPH24	12.1708	14.875	35.93	951.624	34.3	-7.1	41.4	1.55	23.5333	23.85	0.383333	240	44	1	81.0923	123	4	5	113	2021.5
E. hirsutum	EPH25	9.7125	10.725	27.5707	1028.4	30.3	-8.6	38.9	2.96667	21.4833	22.1333	-3.3	232	46	2	68.6392	109	9	13	79	2076
E. hirsutum	EPH26	13.4125	15.3917	39.8748	862.441	33.6	-5	38.6	3.96667	23.35	24.0333	2.73333	180	37	0	88.3884	95	3	4	93	2141.8
E. hirsutum	EPH27	13.3333	14.7333	37.8749	896.071	33.9	-5	38.9	3.5	23.6	24.3	2.16667	211	44	0	90.0868	113	4	5	110	2146.6
E. hirsutum	EPH28	11.2458	14.3583	34.7659	961.784	33.3	-8	41.3	0.4	22.6167	23.0667	-0.716667	276	52	0	82.1699	140	3	6	127	2210
E. hirsutum	EPH29	10.8708	12.8917	33.6597	919.685	31.3	-7	38.3	0.633333	21.6667	22.1167	-0.65	159	32	0	77.9217	80	3	5	64	2224
E. hirsutum	EPH30	11.5125	15.0583	36.3728	942.972	33.3	-8.1	41.4	0.416667	22.4167	22.7667	-0.483333	288	56	0	87.7683	151	3	4	143	2236.8
E. hirsutum	EPH32	8.14583	11.1083	28.928	999.571	28	-10.4	38.4	7.5	19.4667	20.1667	-4.58333	205	41	2	67.7877	100	11	16	63	2591
E. hirsutum	EPH34	10.8375	13.425	35.144	911.173	30.6	-7.6	38.2	1.08333	20.8333	22.05	-0.55	138	29	0	76.6954	67	6	8	57	2600
E. parviflorum	EPP1	14.825	9.53333	32.2072	774.786	30.3	0.7	29.6	9.2	24.0167	24.0167	5.18333	321	55	5	58.5945	139	21	21	113	641
E. parviflorum	EPP2	13.4375	11.625	36.788	745.045	31.4	-0.2	31.6	7.4	22.5333	22.5333	4.61667	450	66	12	49.2013	160	40	40	138	1118
E. parviflorum	EPP3	9.12917	10.9583	34.3521	721.008	26.6	-5.3	31.9	8.05	17.6333	17.6333	0.0166666	472	63	15	37.4571	162	65	65	98	1245
E. parviflorum	EPP4	11.5042	12.225	35.1293	830.852	30.9	-3.9	34.8	5.16667	21.5333	21.5333	1.3	390	61	10	51.1755	151	33	33	119	1436
E. parviflorum	EPP5	9.52917	10.775	31.0519	859.962	28	-6.7	34.7	13.2667	19.7333	19.8833	-1.16667	431	75	17	49.2547	183	62	85	69	1470.8
E. parviflorum	EPP6	8.47917	10.9583	34.3521	729.375	25.8	-6.1	31.9	7.26667	16.95	17.0833	-0.7	428	57	15	37.814	157	62	63	87	1510
E. parviflorum	EPP8	10.4875	10.175	29.0714	921.962	28.8	-6.2	35	4.25	21.4833	21.4833	-1.16667	371	56	9	47.918	136	32	32	116	1625.3
E. parviflorum	EPP9	9.425	11.95	31.1198	983.034	30.4	-8	38.4	7.21667	21.1167	21.3	-2.75	442	84	3	73.2396	214	10	17	137	1719.3
E. parviflorum	EPP10	15.2083	15.0333	38.4484	892.308	35.8	-3.3	39.1	4.1	25.4167	26.1333	4.1	249	54	0	93.1196	134	3	4	134	1722
E. parviflorum	EPP11	11.9583	14.9	38.8021	869.647	33.2	-5.2	38.4	2.06667	22.4333	22.85	1.43333	374	70	0	80.6422	179	2	8	161	1760
E. parviflorum	EPP12	10.4667	12.4	32.8042	933.45	30.5	-7.3	37.8	3.88333	21.3333	21.7	-1.26667	328	59	4	62.5112	142	16	21	109	1857
E. parviflorum	EPP13	12.1667	14.1833	34.5093	965.43	34.1	-7	41.1	1.3	23.5667	24	0.133333	288	53	1	81.513	145	4	6	134	2051.4
E. parviflorum	EPP14	7.82917	11.9417	30.857	969.415	29.1	-9.6	38.7	5.83333	19.4167	19.6	-4	402	71	2	72.8108	190	7	12	128	2114
E. parviflorum	EPP15	9.49167	12.4667	32.381	950.739	30.2	-8.3	38.5	8.11667	20.5167	20.9667	-2.48333	290	54	2	67.2373	134	12	18	94	2163.4
E. parviflorum	EPP16	8.6125	12.925	35.0271	892.033	29	-7.9	36.9	6.15	18.8833	19.3	-2.23333	308	56	5	66.2253	148	17	21	113	2259
E. parviflorum	EPP17	4.10833	11.0167	31.2087	865.697	23.1	-12.2	35.3	2.2	14.3167	14.45	-6.45	388	72	16	54.262	177	53	71	66	2694
		</Point>
